# Supplementary material
Source: HighWire-hosted journal article supplement (http://www.qdcxjkg.com/highwire/filestream/113448/field_highwire_adjunct_files/0/Supplement_Table_120120321.pdf)

**Supplement Table 1. Symptoms of NSCLC patients who presented with miliary intrapulmonary carcinomatosis at initial diagnosis**

|                                 | <b>Patients</b> | <b>(%)</b> |
|---------------------------------|-----------------|------------|
| <b>Respiratory symptoms</b>     |                 |            |
| Cough                           | 56              | (66)       |
| Dyspnea                         | 36              | (42)       |
| Sputum                          | 25              | (29)       |
| Chest pain or discomfort        | 23              | (27)       |
| Hemoptysis                      | 12              | (14)       |
| Hoarseness                      | 2               | (2)        |
| <b>Non-respiratory symptoms</b> |                 |            |
| Weight loss                     | 38              | (45)       |
| Malaise                         | 17              | (20)       |
| Low back pain                   | 4               | (5)        |
| Extremity weakness              | 4               | (5)        |
| Altered consciousness           | 3               | (4)        |
| Night sweats                    | 1               | (1)        |

**Supplement Table 2. The different *EGFR* mutation types**

| <b><i>EGFR</i> mutations</b> | <b>Patients</b> | <b>(%)</b>   |
|------------------------------|-----------------|--------------|
| Wild type                    | 18              | (30)         |
| Del-19                       | 21              | (35)         |
| L858R                        | 12              | (20)         |
| Del-19 + A871V               | 1               | (2)          |
| E709A + L858R                | 1               | (2)          |
| G719A + S720F                | 1               | (2)          |
| G719A + S768I                | 1               | (2)          |
| A767_V769dupASV              | 1               | (2)          |
| N771_P772insN                | 1               | (2)          |
| H850D + L858R                | 1               | (2)          |
| V851I                        | 1               | (2)          |
| L858P                        | 1               | (2)          |
| <b>Total</b>                 | <b>60</b>       | <b>(100)</b> |

**Supplemental Table 3. The treatment sequence and the EGFR mutation status**

| EGFR analysis   | Treatment sequence <sup>&amp;</sup> |                       |                                |                       |                       |                                | Total |
|-----------------|-------------------------------------|-----------------------|--------------------------------|-----------------------|-----------------------|--------------------------------|-------|
|                 | Best supportive care                | TKI only <sup>δ</sup> | Chemotherapy only <sup>δ</sup> | TKI then Chemotherapy | Chemotherapy then TKI | Chemotherapy then Chemotherapy |       |
| <b>Mutation</b> | 4                                   | 7                     | 0                              | 16                    | 7                     | 8                              | 42    |
| <b>Wild</b>     | 0                                   | 6                     | 0                              | 6                     | 3                     | 3                              | 18    |
| <b>Unknown</b>  | 1                                   | 5                     | 5                              | 3                     | 5                     | 6                              | 25    |
| <b>Total</b>    | 5                                   | 18                    | 5                              | 25                    | 15                    | 17                             | 85    |

<sup>&</sup> The sequence of patient treatment courses were classified according to the first-line and second-line medications.

<sup>δ</sup>TKI only and chemotherapy only patients received only first-line systemic treatment without second-line treatment.

**Supplemental Figure 1** Kaplan-Meier survival curve of progression-free survival after EGFR TKIs in the patients presented with miliary intra-pulmonary carcinomatosis at initial diagnosis. The patients with *EGFR* mutation (solid line, N=38) had a longer progression-free survival than those with wild type of *EGFR* (dashed, N=17) (median, 9.2 months vs. 2.7 months;  $p < 0.001$ , by the log-rank test)

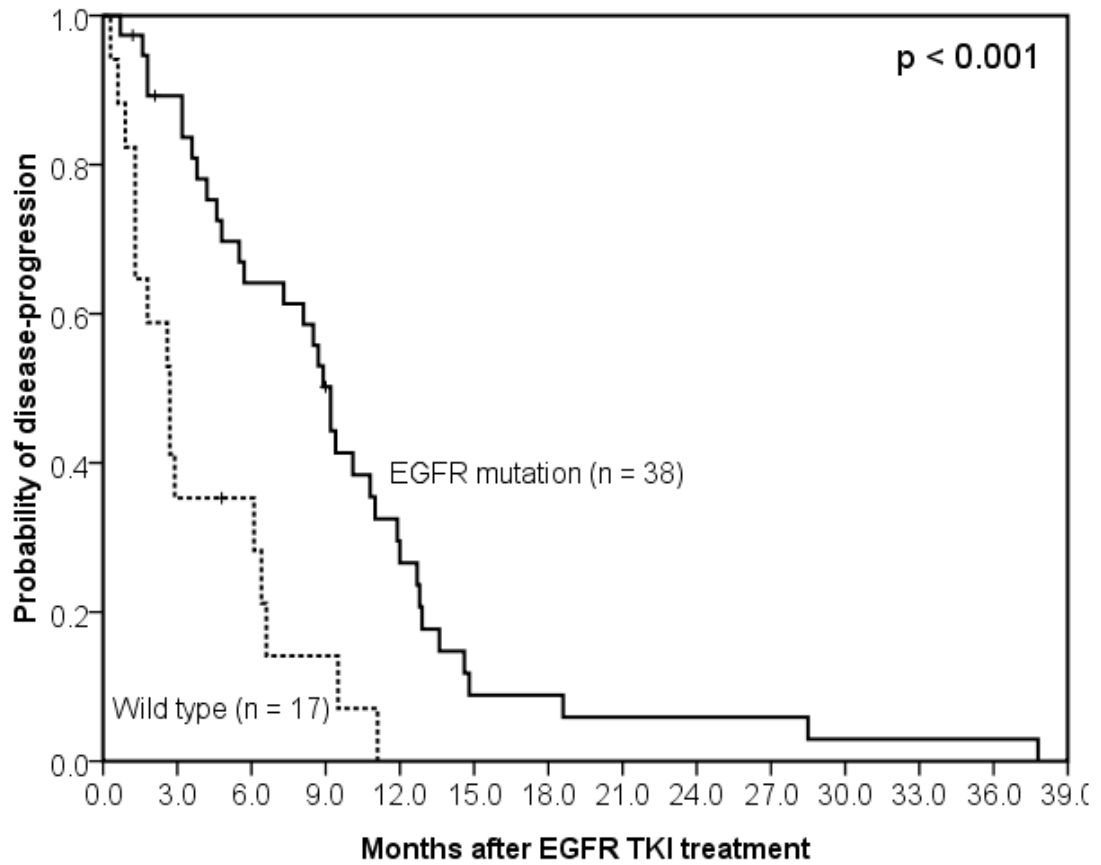

Supplement: Supplement_Table_120120321.pdf [file Supplement_Table_120120321.pdf]
